# Supplementary material for: Observation- and model-based estimates of particulate dry nitrogen deposition to the oceans
Source: Copernicus journal article supplement (doi:10.5194/acp-17-8189-2017), 2017-07-05
Supplement: Supplementary file 1 [file acp-17-8189-2017-supplement.zip]

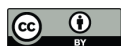

*Supplement of*

## **Observation- and model-based estimates of particulate dry nitrogen deposition to the oceans**

**Alex R. Baker et al.**

*Correspondence to:* Alex R. Baker ([alex.baker@uea.ac.uk](mailto:alex.baker@uea.ac.uk))

- [acp-17-8189-2017-supplement-title-page.pdf](#)
- [Aerosol-N-Conc-Data.xlsx](#)
- [Supplement-resubmit.docx](#)

The copyright of individual parts of the supplement might differ from the CC BY 3.0 License.
